# Supplementary material
Source: Research Square preprint supplement (doi:10.21203/rs.3.rs-8874509/v1)
Supplement: Supplementary file 1 [file 5eaf5fceef3bdc4b287ba158.pdf]

# Genomic Entropy confers an aggressive Phenotype in Mesothelioma

John W Oketch<sup>1</sup>, Charlotte Poile<sup>1</sup>, Maurice Dungey<sup>1,2</sup>, Nathaniel Kuse<sup>1</sup>, Jan Rogel<sup>1</sup>, Hesam Moazzen<sup>1</sup>, Joanna Dzialo<sup>1</sup>, Tasneem Ibrahim<sup>1</sup>, Kudzayi Kutuwawo<sup>1,2</sup>, Apostolos Nakas<sup>2</sup>, Ihsaan Sabil<sup>1</sup>, Shreya Ramalamgam<sup>1</sup>, Nada Nusrat<sup>1</sup>, Aleksandra Bzura<sup>1,3</sup>, Yue Lin<sup>1</sup>, Daniel Buckler<sup>1</sup>, Mazin H Alhazmi<sup>4</sup>, Alan Dawson<sup>1,2</sup>, Francois Ng Kee Kwong<sup>1,5,6</sup>, Panagiotis Barmpoutis<sup>1,6</sup>, Hongji Yang<sup>7</sup>, Huiyu Zhou<sup>7</sup>, Richard Badge<sup>4</sup>, Cristina Tufarelli<sup>8</sup>, Amrita Bajaj<sup>2</sup>, Heath Hopewell<sup>2</sup>, Annabel J Sharkey<sup>1,9</sup>, Sara Busacca<sup>1,10</sup>, Jinli Luo<sup>1,11</sup>, Catherine Jane Richards<sup>2</sup>, Peter Wells-Jordan<sup>2</sup>, Kevin Groot-Lipman<sup>12</sup>, Jens C Hahne<sup>1</sup>, Haining Yang<sup>13</sup>, Michele Carbone<sup>13</sup>, Aaron S Mansfield<sup>14</sup>, Edward J Hollox<sup>4</sup>, Min Zhang<sup>1,15</sup>, Dean. A. Fennell<sup>1,2</sup>

## Supplementary Information

### Content:

Supplementary figure S1-S7

Supplementary Table

[Link to figures' source data and extended data supporting the analyses](#)

# FIGURE S1

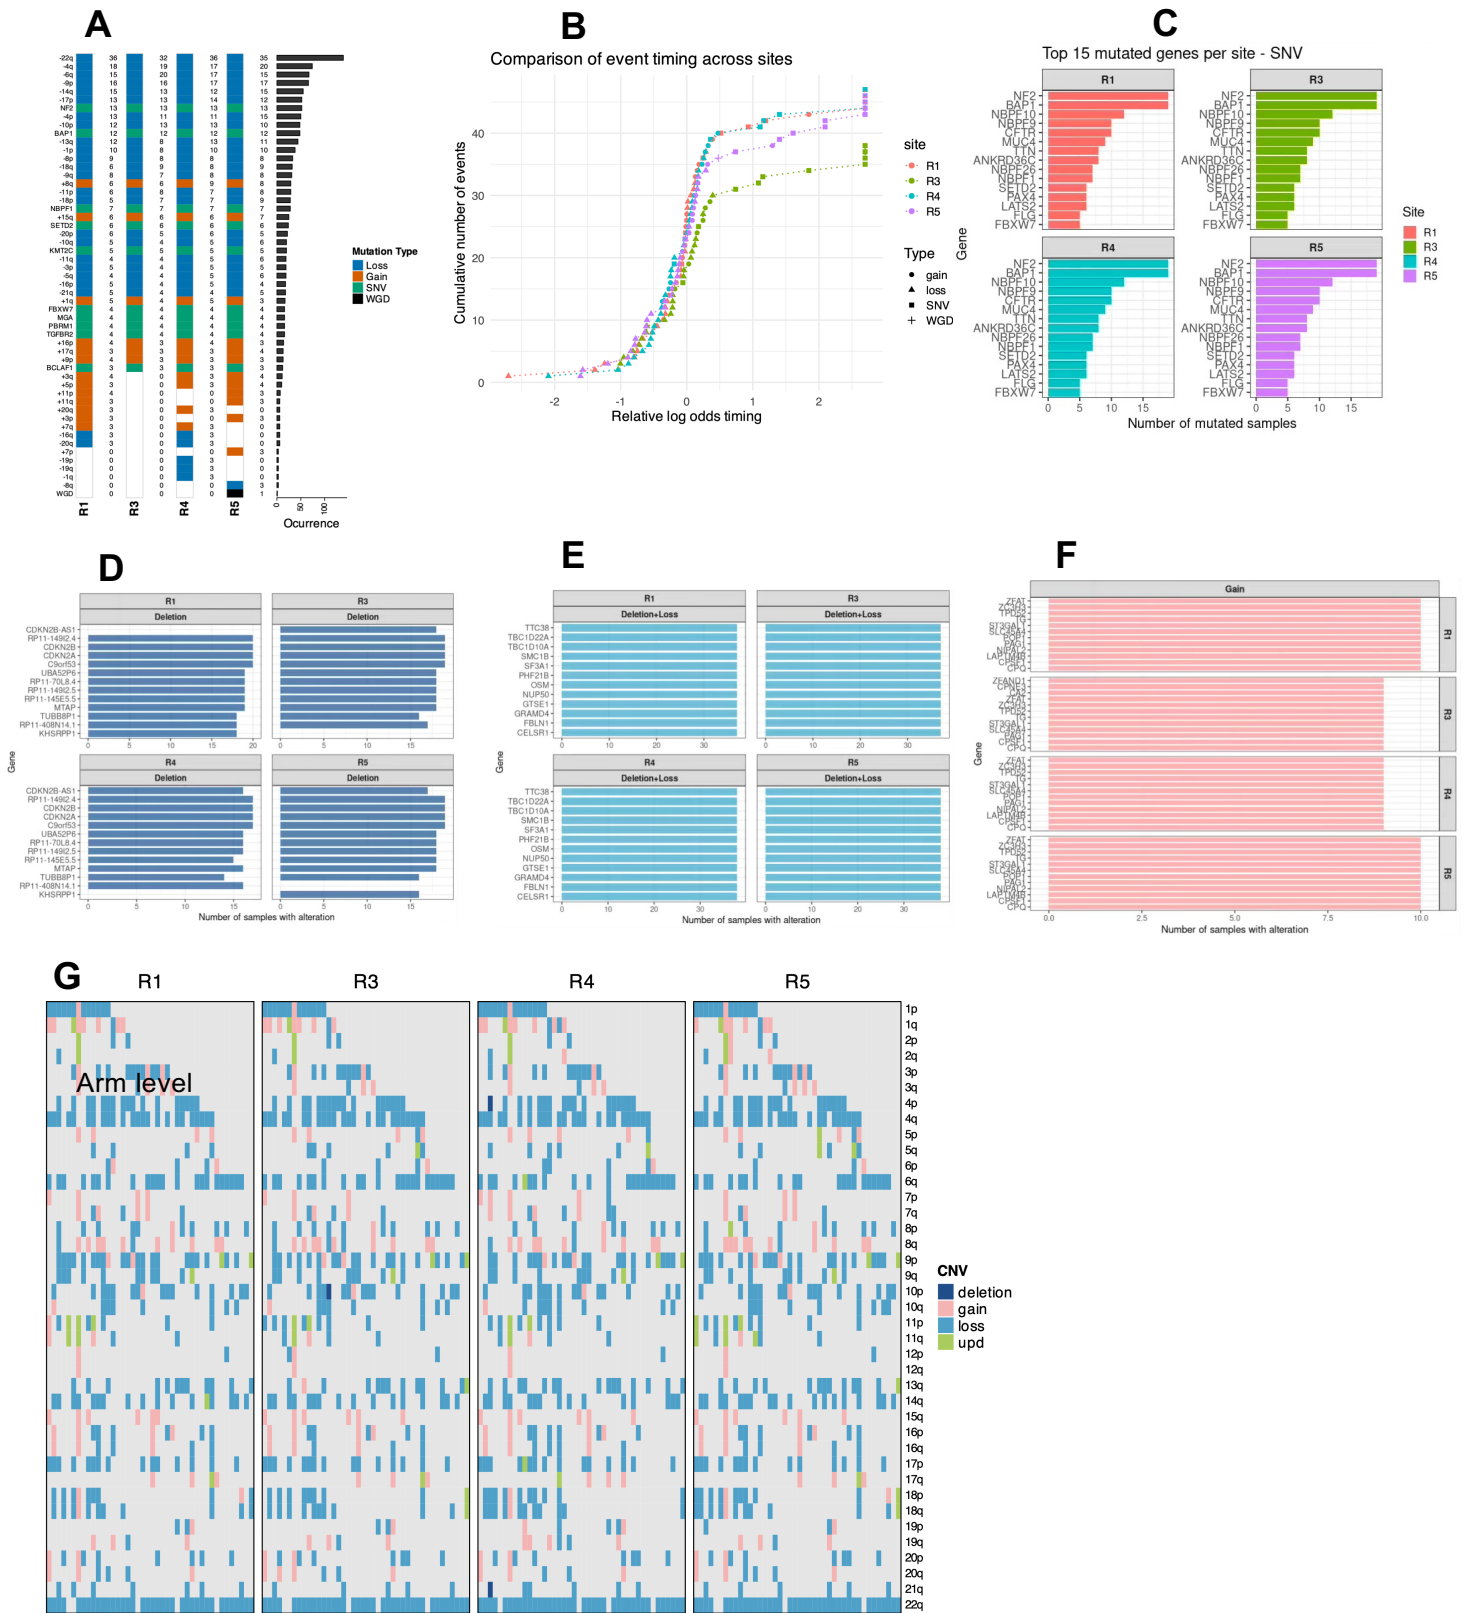

**Figure S1 | Spatial genetic evolution trajectories in mesothelioma from multi-region biopsies**

(A) Heatmap of recurrent mutations identified by PhylogicNDT (Timing and League modules) across 42 Medusa samples with biopsies from four sites (apex (R1), pericardium (R2), anterior (R3), posterior (R4), costophrenic angles, and oblique fissure (R5)); mutations coloured by type. R2 was sequenced in only 8 samples and excluded from analysis. (B) Cumulative driver event counts stratified by median relative timing and mutation type per sampling site. (C–F) Analysis of site-specific mutation frequency based on nonsynonymous mutations and gene-level copy number alterations; no genes showed significant differential mutation across sites. (G) Heatmap of arm-level copy number calls across 42 samples and sites. Tiles coloured by status (deletion, gain, UPD); arm-level calls required >50% arm length coverage (weighted by segment length).

# Figure S2

## Gene-level somatic single nucleotide variant (SNV) mutations

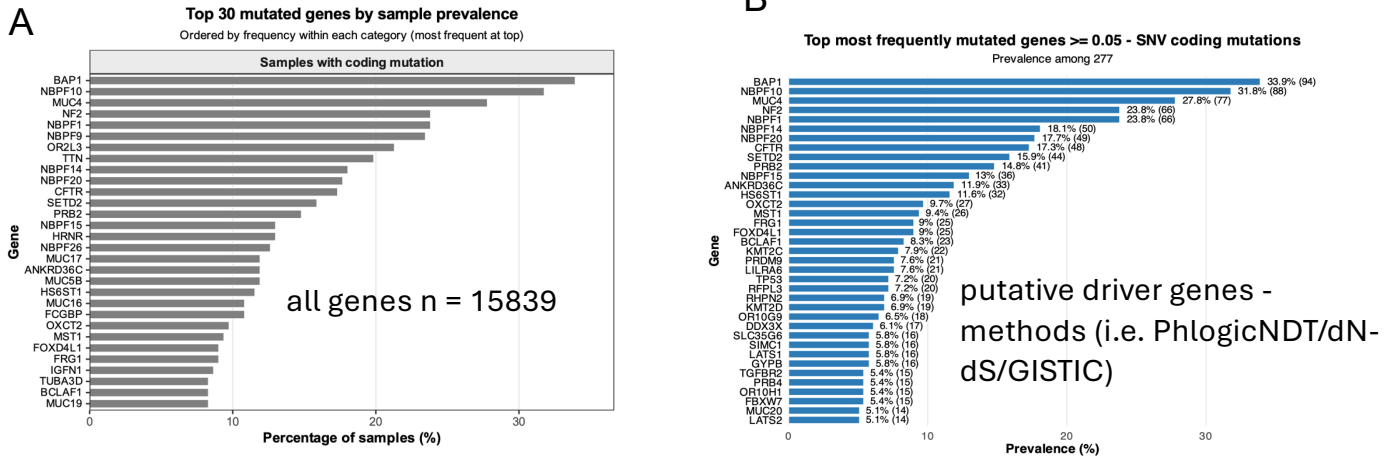

## SNV/gene level copy number alterations

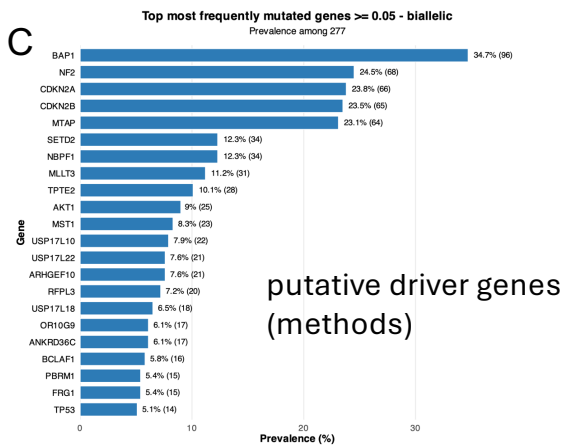

## gene level copy number alterations among putative driver genes

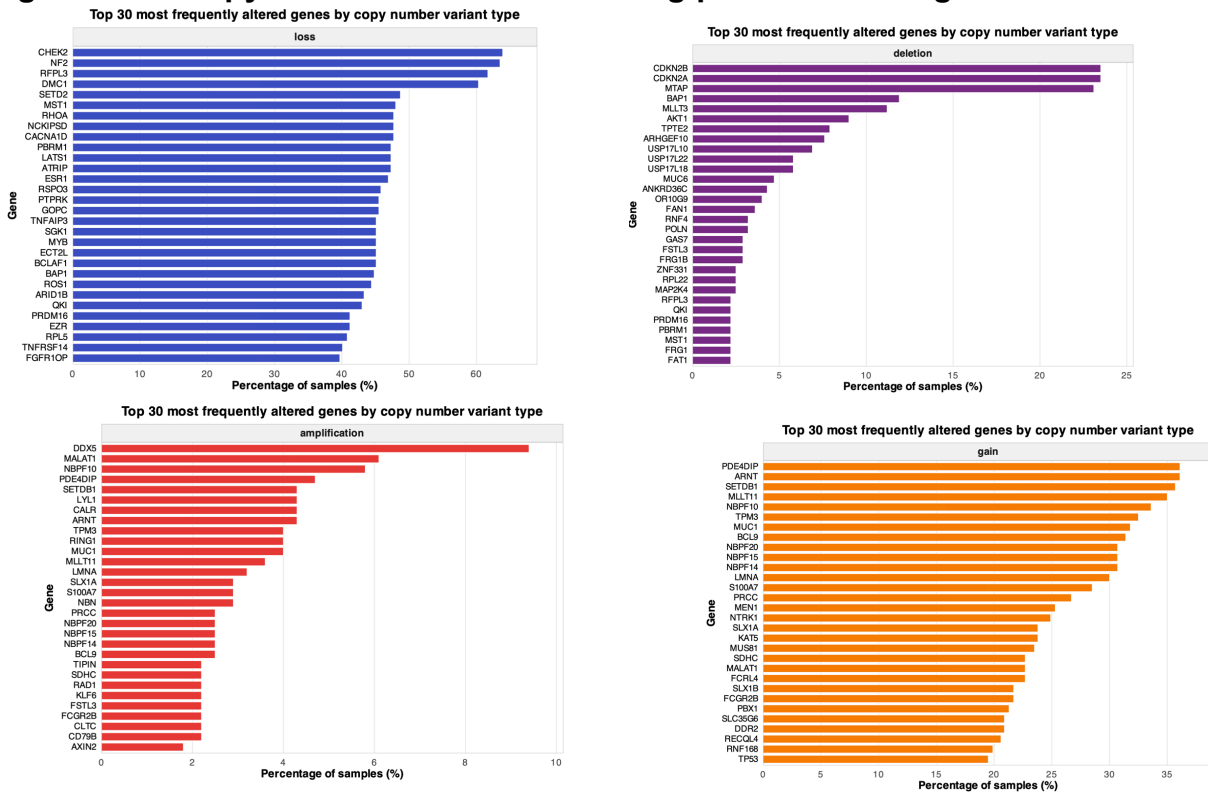

Figure S2 | Recurrent somatic alterations

(A–B) Frequently mutated genes based on non-synonymous SNVs (nonsense, missense, nonstop, frameshift, splice-site, start-site, and in-frame indels) across (A) all 15,839 genes and (B) 277 putative driver genes identified by PhylogiCNDT, dN/dS, and GISTIC analyses. (C) Genes with biallelic inactivation, defined as homozygous deletion or heterozygous loss with a non-synonymous SNV on the remaining allele. (E–G) Most frequently altered putative driver genes based on gene-level copy number status.

**Figure S3**

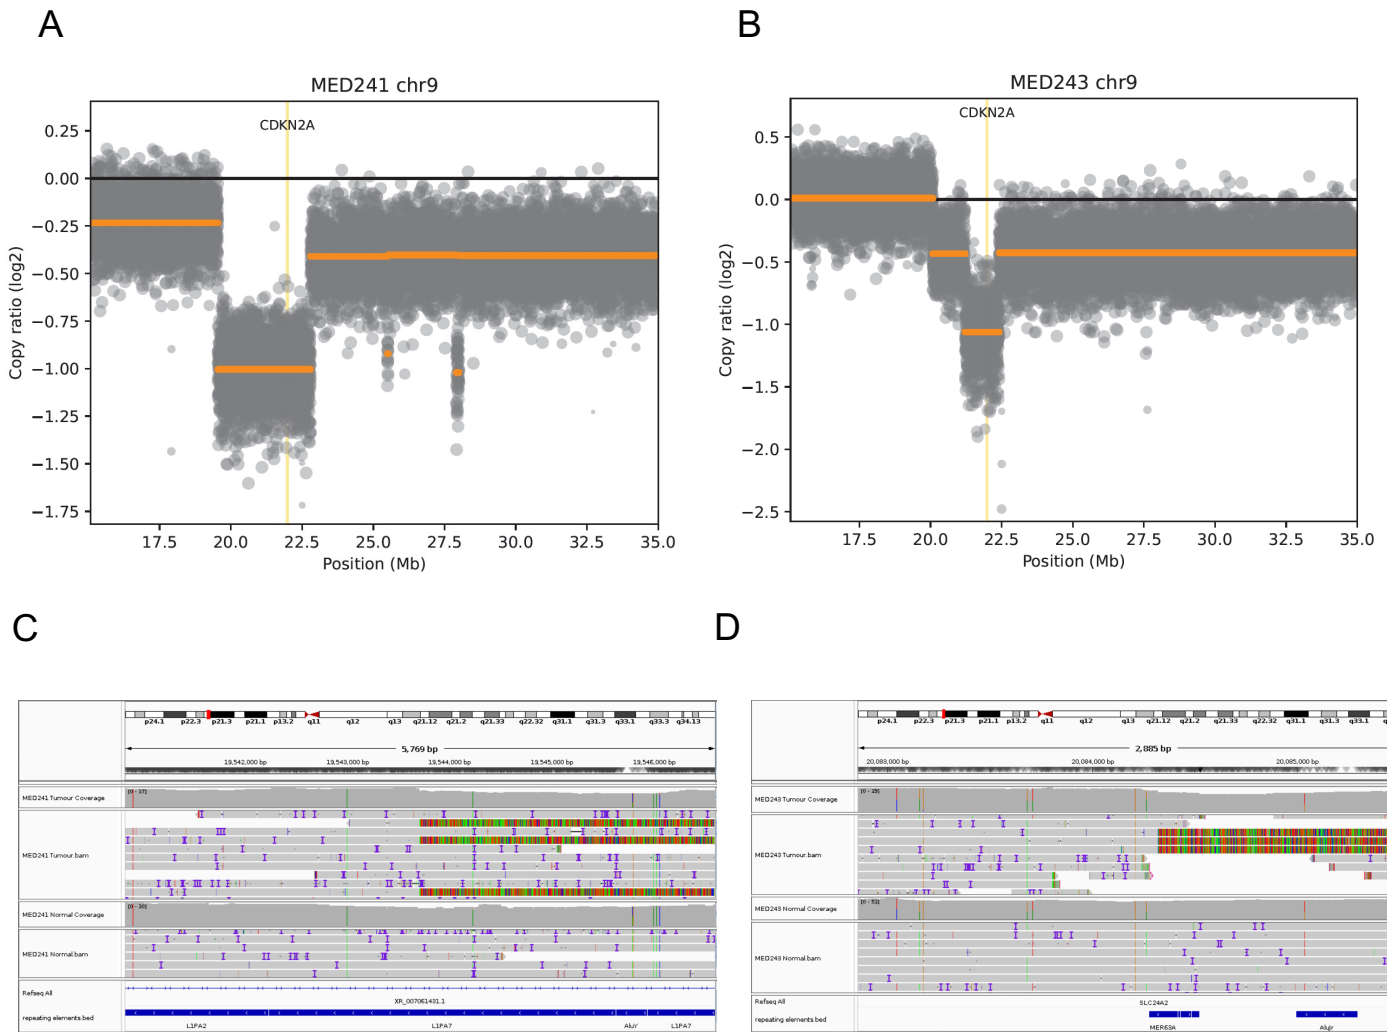

**Figure S3 | Identification of L1 retro-transposition at CDKN2A deletion breakpoints**

Read depth analysis of tumours from patients MED241 (A) and MED243 (B) showing homozygous deletion of CDKN2A. Identification of soft-clipped long sequencing ONT reads from MED241 (C) and MED243 (D) using the Integrative Genomics Viewer.

**Figure S4**

**A** All genes significantly associated with WSE < 0.05 (FDR)

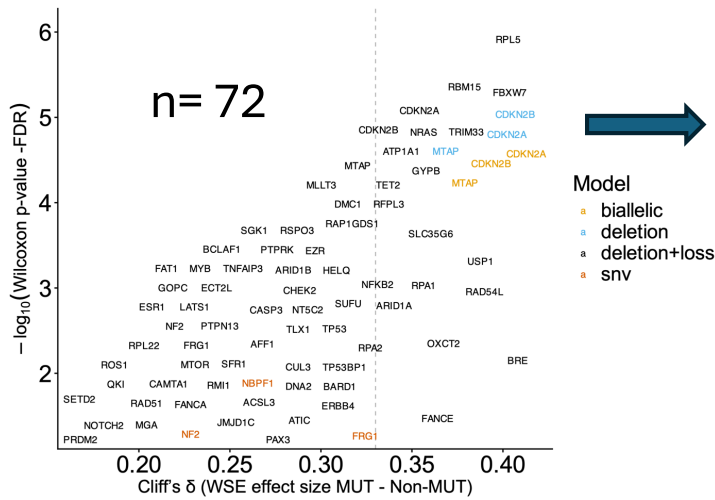

**B**

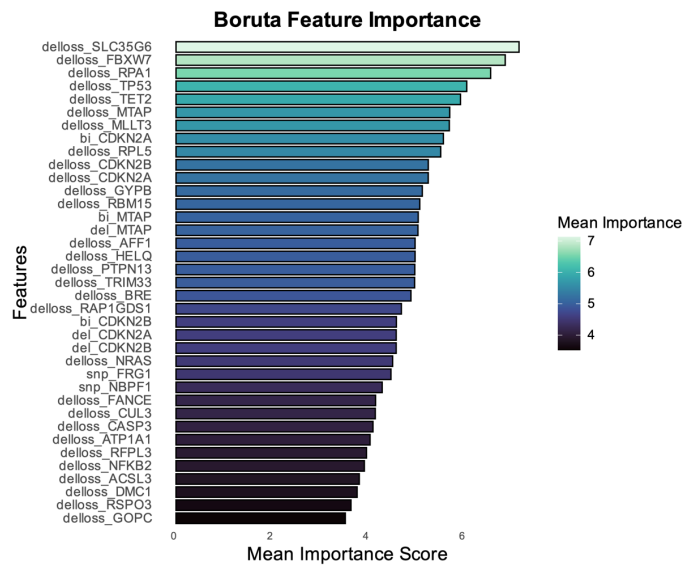

**C** Top genes significantly associated with WSE < 0.05 (FDR) identified by Boruta

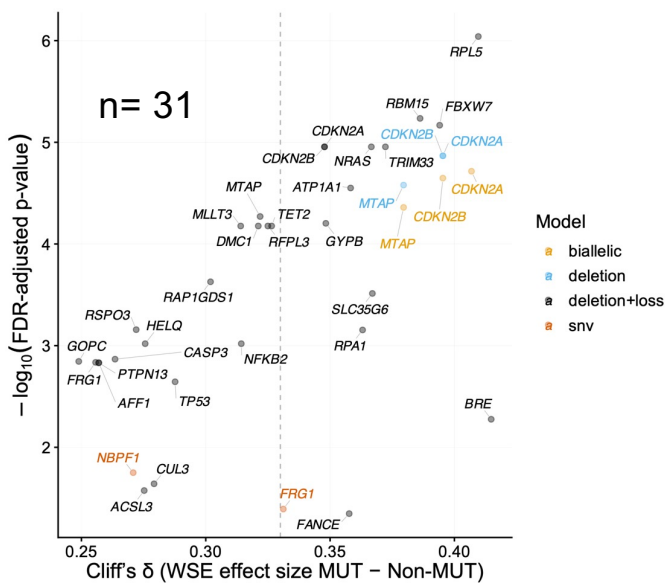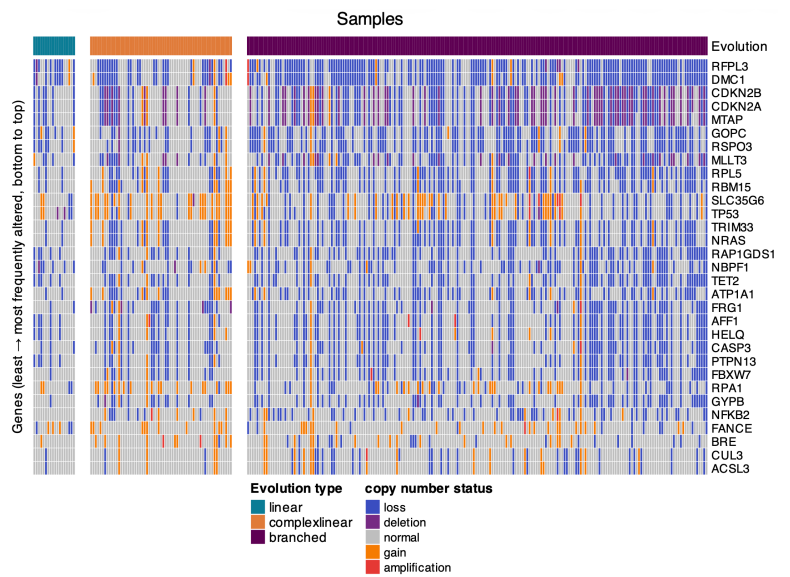

**Figure S4 | Associations between driver gene alterations and intratumor heterogeneity (WSE)**

(A,B) Gene-level associations between genomic alterations and whole-sample entropy (WSE) were assessed using Wilcoxon rank-sum tests across four alteration classes (SNVs, homozygous deletions, loss/deletions, gain/amplifications, and biallelic inactivation) for a targeted set of 297 genes, including genes under positive selection by dN/dS analysis and focal somatic copy number alterations (SCNAs) from GISTIC2.0 intersected with the COSMIC Cancer Gene Census and DNA damage response genes. (A) One-sided, FDR-adjusted P values for WSE in mutant versus non-mutant tumours across 277 samples, grouped by alteration type (biallelic inactivation, deletion, deletion plus loss, gain, and coding SNVs); only genes with P < 0.05 are shown, and the vertical dotted line indicates the median Cliff's delta effect-size threshold (0.3). Genes are coloured by alteration model. (B) Boruta feature selection highlighting top gene alterations associated with WSE. (C) As in (A) but restricted to top-ranked genes. (D) Heatmap of copy number status for top genes across 277 tumours stratified by phylogenetic topology (L, CL, B)

## FIGURE S5

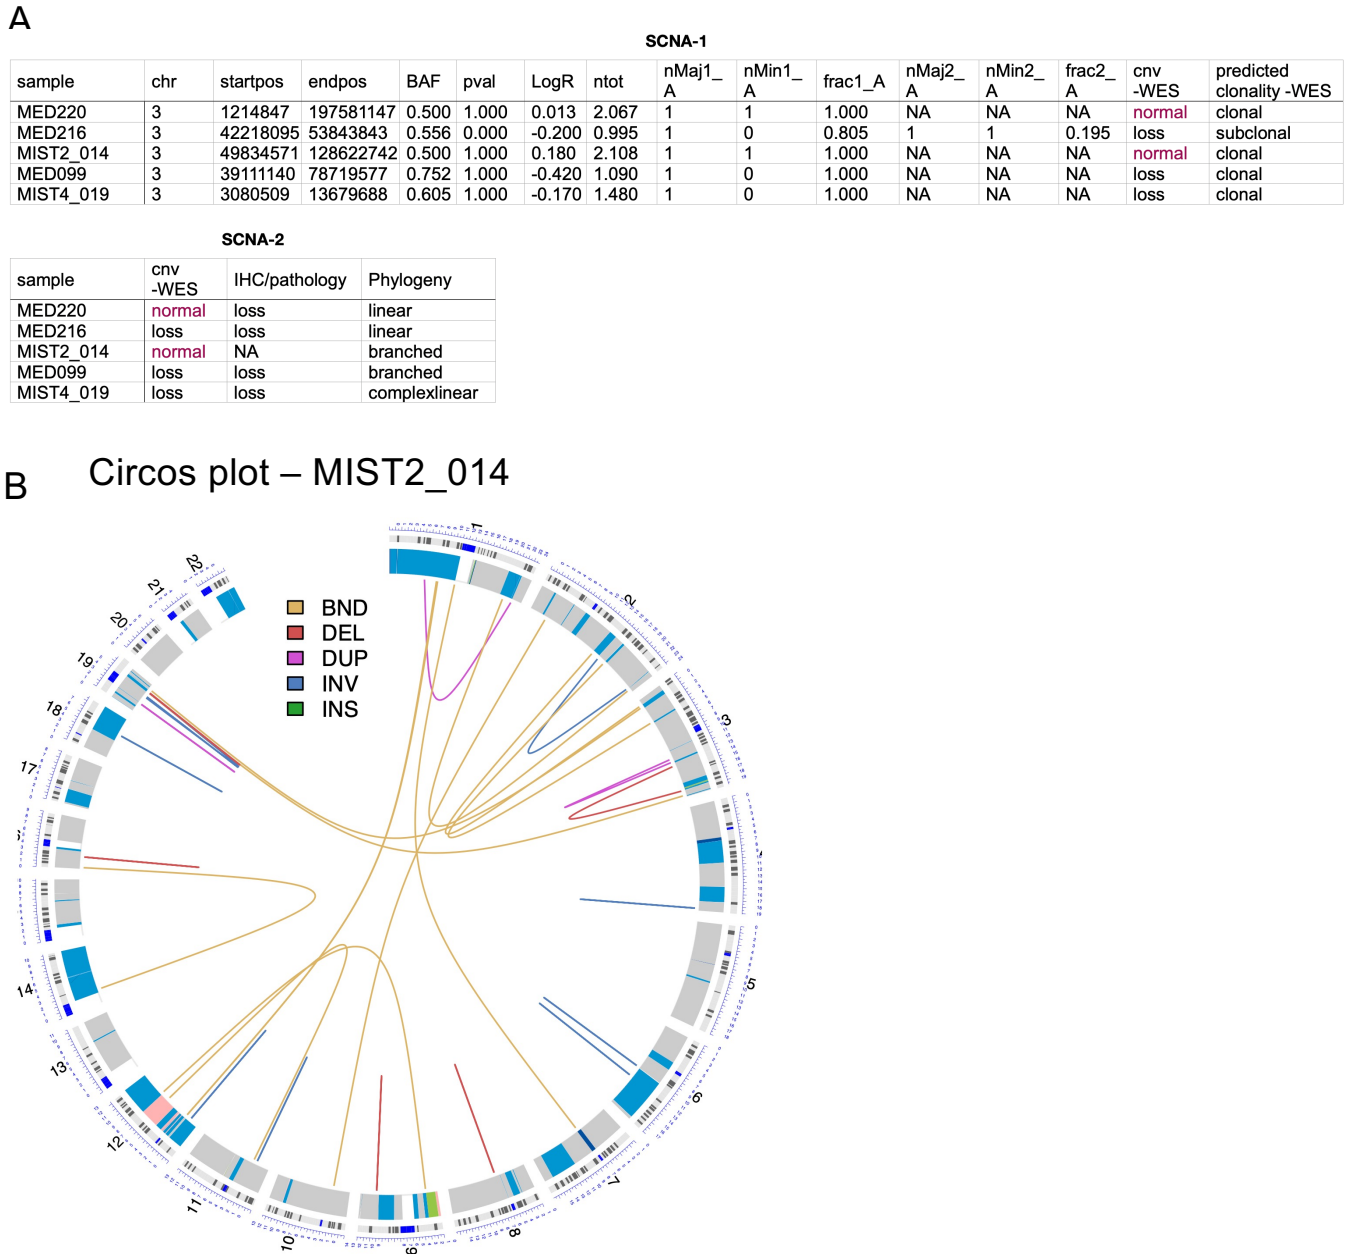

**Figure S5 | Somatic copy number alterations and structural variation in *BAP1* germline mutant mesothelioma tumours**

(A) Summary of somatic copy-number alteration (SCNA) calls on chromosome 3 encompassing the *BAP1* locus across five germline carriers. Clonality was inferred using Battenberg, and phylogenetic reconstruction was performed using the PhylogicNDT *Cluster* and *BuildTree* modules. (B), Circos plot for sample MIST2\_014 illustrating extensive structural variation, including inter- and intra-chromosomal rearrangements (breakpoints, deletions, duplications, inversions and insertions), consistent with highly complex genome architecture. The density and connectivity of rearrangements indicate catastrophic chromosomal restructuring, compatible with chromothripsis-like events

# Figure S6

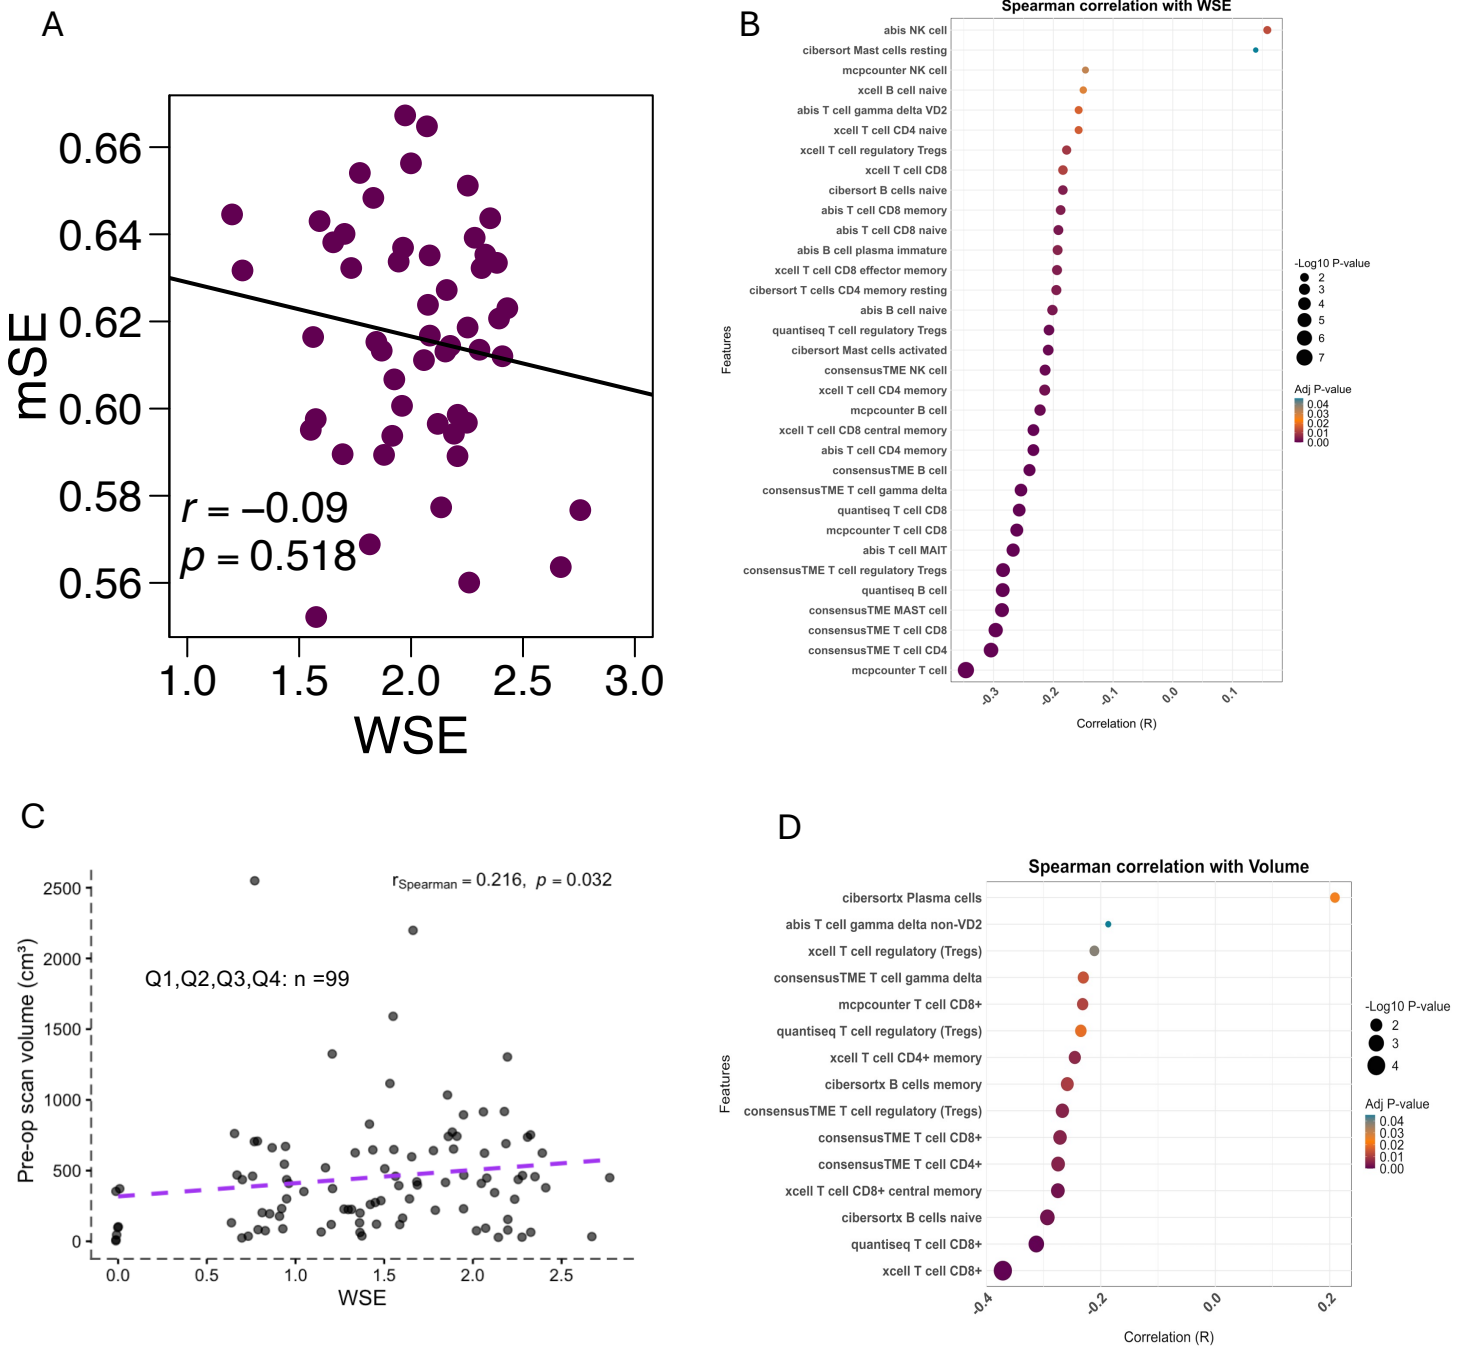

## Figure S6 | WSE associations between methylation entropy, tumour volume, and immune composition

(A) Scatter plot showing methylation Shannon entropy (mSE) versus weighted Shannon entropy (WSE) in mesothelioma tumors (n = 52). Each point represents a tumor sample. Spearman's rank correlation coefficient ( $r$ ) and permutation-based  $p$  value (10,000 permutations) are shown on the plot. (B) Bubble plot showing Spearman correlation between WSE and estimated fractions of CD8<sup>+</sup> T cells, NK cells, and B cells. Both CD8<sup>+</sup> T cells and B cells exhibited consistent negative correlations with WSE across independent deconvolution methods. (C) Spearman correlation between WSE and AI tumour volume showing a positive association between the two measures across Q1 to Q4 tumors. (D) Bubble plot showing Spearman correlation between tumour AI volume and immune cell fractions. Larger volumes were negatively correlated with CD8<sup>+</sup> T cells and B cells across deconvolution methods.

# FIGURE S7

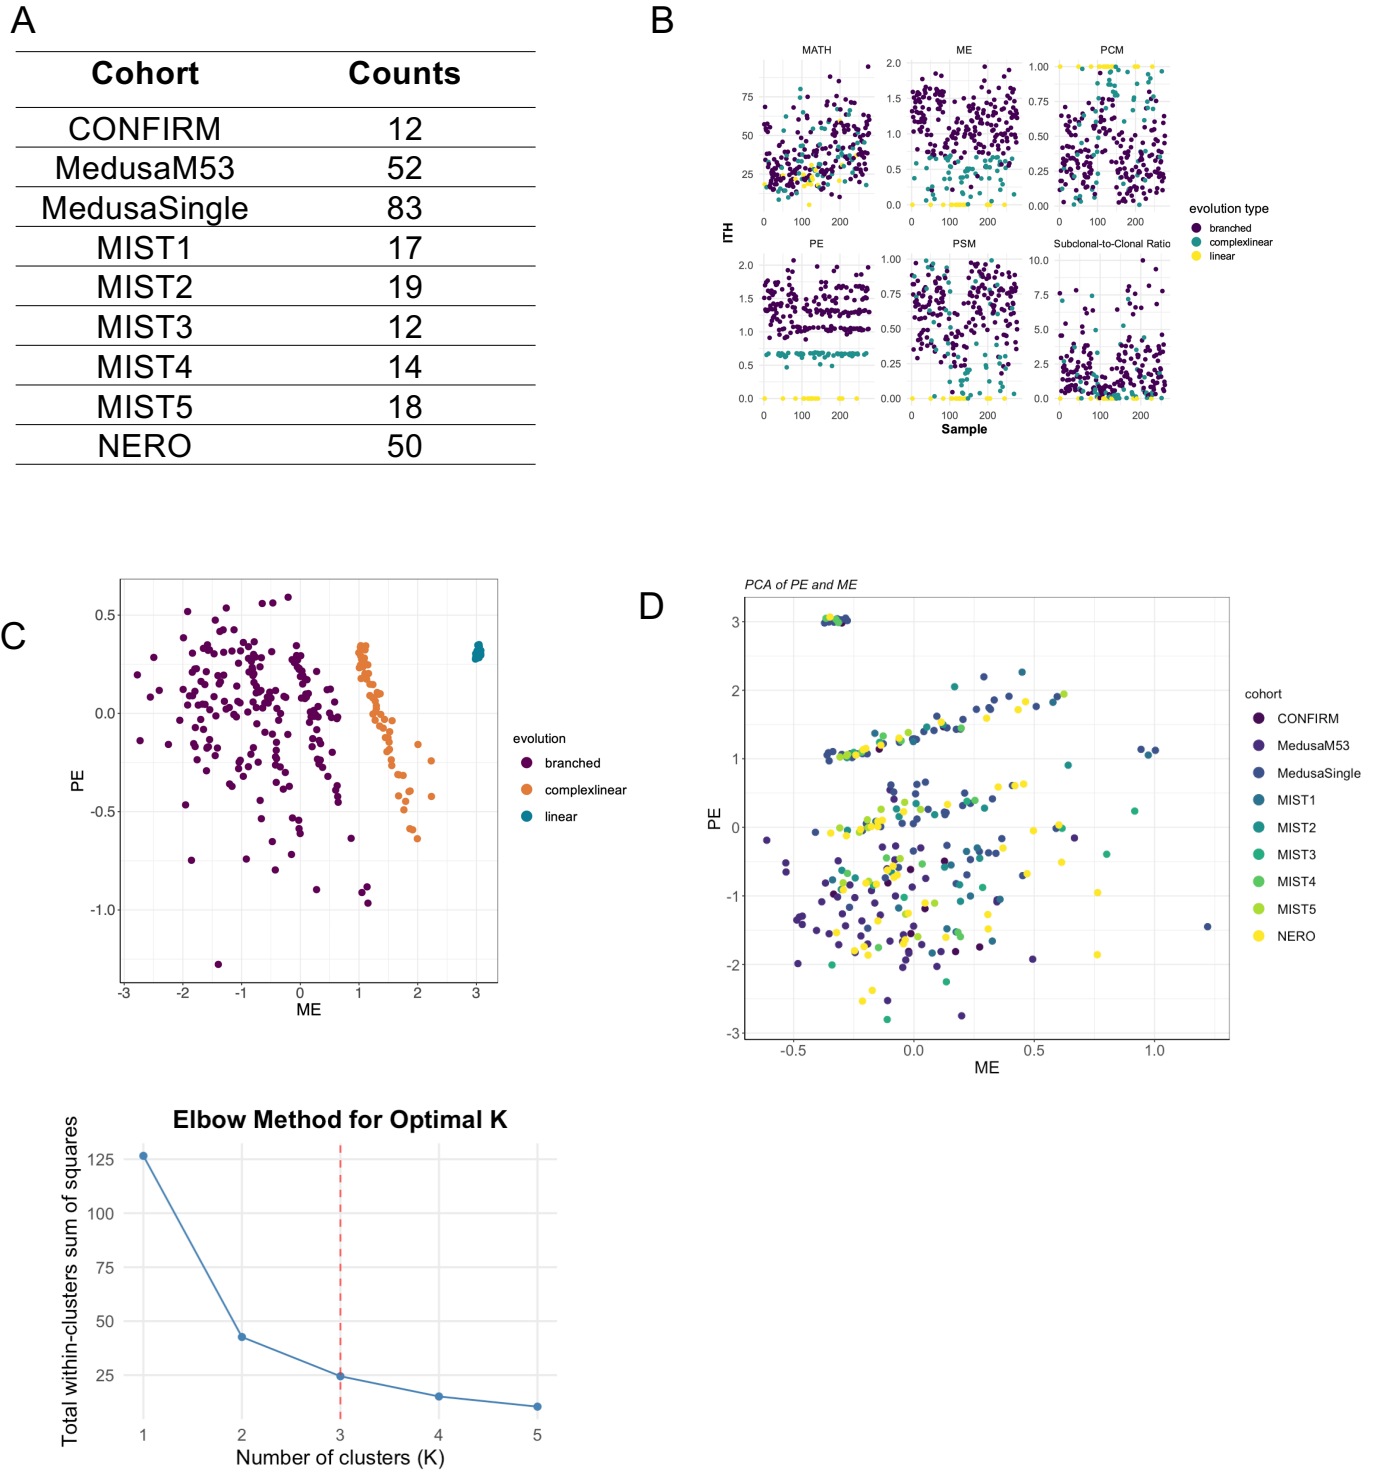

**Figure S7 | Cohort composition and validation of intratumour heterogeneity metrics.**

(A) Number of participants analysed per cohort. (B) Scatter plots of 277 tumours across intratumour heterogeneity (ITH) matrices, with each point representing a single tumour coloured by phylogenetic topology. (C–D) Principal component analysis (PCA) of the 277 tumours based on proportion entropy (PE) and mutation entropy (ME), stratified by phylogenetic topology (C) and cohort (D). (E) Elbow plot of k-means clustering on phylogenetic metrics showing total within-cluster sum of squares (WSS) versus number of clusters ( $K = 1-5$ ). A clear inflection at  $K = 3$  indicates three main groups. Combined PE and ME better resolved phylogenetic topologies compared with MATH score or PSM and demonstrated a homogeneous distribution across the cohorts. Phylogenetic trees are available at <https://doi.org/10.25392/leicester.data.31073389>.

**Table S1** : Genes within recurrent somatic copy number alteration peaks identified by GISTIC2.0 that map to early evolutionary epochs inferred by PhylogicNDT

| Gene     | Event    | ROLE_IN_CANCER        | TIER | Arm |
|----------|----------|-----------------------|------|-----|
| BRCA2    | deletion | TSG                   | 1    | 13q |
| FOXO1    | deletion | oncogene, TSG, fusion | 1    | 13q |
| LCP1     | deletion | fusion                | 2    | 13q |
| RB1      | deletion | TSG                   | 1    | 13q |
| NBEA     | deletion |                       | 2    | 13q |
| CYSLTR2  | deletion | oncogene              | 2    | 13q |
| ARNT     | deletion | oncogene, TSG, fusion | 1    | 1p  |
| ATP1A1   | deletion | oncogene, TSG         | 1    | 1p  |
| BCL9     | deletion | oncogene, fusion      | 1    | 1p  |
| FCGR2B   | deletion | oncogene, fusion      | 1    | 1p  |
| LMNA     | deletion | fusion                | 1    | 1p  |
| MUC1     | deletion | fusion                | 1    | 1p  |
| NOTCH2   | deletion | oncogene, TSG         | 1    | 1p  |
| NRAS     | deletion | oncogene              | 1    | 1p  |
| NTRK1    | deletion | oncogene, TSG, fusion | 1    | 1p  |
| DDR2     | deletion | oncogene              | 1    | 1p  |
| PBX1     | deletion | oncogene, fusion      | 1    | 1p  |
| PRCC     | deletion | fusion                | 1    | 1p  |
| RPL5     | deletion | TSG                   | 1    | 1p  |
| S100A7   | deletion | fusion                | 2    | 1p  |
| SDHC     | deletion | TSG                   | 1    | 1p  |
| TPM3     | deletion | TSG, fusion           | 1    | 1p  |
| PDE4DIP  | deletion | fusion                | 1    | 1p  |
| SETDB1   | deletion | oncogene              | 2    | 1p  |
| MLLT11   | deletion | fusion                | 1    | 1p  |
| TRIM33   | deletion | TSG, fusion           | 1    | 1p  |
| RBM15    | deletion | fusion                | 1    | 1p  |
| FCRL4    | deletion | oncogene, fusion      | 1    | 1p  |
| MTOR     | deletion | oncogene              | 1    | 1p  |
| RPL22    | deletion | TSG, fusion           | 1    | 1p  |
| SKI      | deletion | oncogene              | 2    | 1p  |
| PRDM2    | deletion | TSG                   | 2    | 1p  |
| TNFRSF14 | deletion | TSG                   | 1    | 1p  |
| CAMTA1   | deletion | TSG, fusion           | 1    | 1p  |
| PRDM16   | deletion | oncogene, fusion      | 1    | 1p  |
| RHOA     | deletion | oncogene, TSG         | 1    | 3p  |
| CACNA1D  | deletion | oncogene              | 1    | 3p  |
| BAP1     | deletion | TSG                   | 1    | 3p  |
| SETD2    | deletion | TSG                   | 1    | 3p  |
| NCKIPSD  | deletion | fusion                | 2    | 3p  |
| PBRM1    | deletion | TSG                   | 1    | 3p  |
| CTNNB1   | deletion | oncogene, fusion      | 1    | 3p  |
| ESR1     | deletion | oncogene, TSG, fusion | 1    | 6q  |
| MYB      | deletion | oncogene, fusion      | 1    | 6q  |
| PTPRK    | deletion | TSG, fusion           | 1    | 6q  |
| ROS1     | deletion | oncogene, fusion      | 1    | 6q  |
| SGK1     | deletion | oncogene              | 2    | 6q  |
| TNFAIP3  | deletion | TSG                   | 1    | 6q  |
| EZR      | deletion | fusion                | 1    | 6q  |
| LATS1    | deletion | TSG                   | 1    | 6q  |
| QKI      | deletion | oncogene, TSG         | 1    | 6q  |
| BCLAF1   | deletion |                       | 2    | 6q  |
| FGFR10P  | deletion | fusion                | 1    | 6q  |
| GOPC     | deletion | fusion                | 1    | 6q  |
| ARID1B   | deletion | TSG                   | 1    | 6q  |
| RSPO3    | deletion | oncogene, fusion      | 1    | 6q  |
| ECT2L    | deletion |                       | 2    | 6q  |
| FGFR1    | deletion | oncogene, fusion      | 1    | 8p  |
| NRG1     | deletion | TSG, fusion           | 1    | 8p  |
| PCM1     | deletion | fusion                | 1    | 8p  |
| WRN      | deletion | TSG                   | 1    | 8p  |
| ARHGEF10 | deletion | TSG                   | 2    | 8p  |
| LEPROTL1 | deletion | TSG                   | 2    | 8p  |

# Extended data

- Figures' source data can also be obtained at –  
<https://doi.org/10.25392/leicester.data.31073389>
- Extended data -  
<https://doi.org/10.25392/leicester.data.31073389>
